# Supplementary material for: Revealing the different effects of VIB transition metals X (X = Cr, Mo, W) on the electrochemical performance of Li-rich cathode Li2MnO3 by first-principles calculations
Source: Royal Society of Chemistry journal article supplement (doi:10.1039/d2nr04894a), 2022-01-01
Supplement: d2nr04894a1.pdf [file d2nr04894a1.pdf]

**Supporting Information for**  
**Revealing the different effects of VIB transition metal X (X = Cr, Mo,**  
**W) on the electrochemical performance of Li-rich cathode  $\text{Li}_2\text{MnO}_3$**   
**by first-principles calculations**

Shiwei Zhang<sup>a</sup>, Jianchuan Wang<sup>a,\*</sup>, Huan Liu<sup>b</sup>, Weibin Zhang<sup>b</sup>, Lixian Sun<sup>c</sup>, Yong Du<sup>a</sup>, Hans J Seifert<sup>d</sup>, Ting Lei<sup>a</sup>

<sup>a</sup> State Key Laboratory of Powder Metallurgy, Central South University, 410083, Changsha

<sup>b</sup> Key Laboratory for Liquid-Solid Structural Evolution and Processing of Materials (Ministry of Education), Shandong University, 250061, Jinan, China

<sup>c</sup> Guangxi Key Laboratory of Information Materials, Guilin University of Electronic Technology, 541004, Guilin, China

<sup>d</sup> Institute for Applied Materials, Karlsruhe Institute of Technology, Germany

Corresponding author: \* jcw728@126.com

**Table S1.** The energies of  $\text{Li}_2\text{MnO}_3$  with different magnetic configurations.

| Magnetic configuration | Energy (eV/f.u.) |
|------------------------|------------------|
| ferromagnetic          | -37.1728         |
| antiferromagnetic      | -37.1642         |

**Table S2.** Lattice parameters and volumes of  $\text{Li}_2\text{MnO}_3$  and  $\text{Li}_2\text{MnO}_3$  with Cr, Mo and W dilute doping.

| System                        | Lattice parameter ( $\text{\AA}$ ) |       |       | Volume ( $\text{\AA}^3$ ) |
|-------------------------------|------------------------------------|-------|-------|---------------------------|
|                               | a                                  | b     | c     |                           |
| $\text{Li}_2\text{MnO}_3$     | 5.010                              | 8.660 | 5.091 | 208.223                   |
| Cr- $\text{Li}_2\text{MnO}_3$ | 5.015                              | 8.659 | 5.094 | 208.441                   |
| Mo- $\text{Li}_2\text{MnO}_3$ | 5.040                              | 8.690 | 5.107 | 210.642                   |
| W- $\text{Li}_2\text{MnO}_3$  | 5.036                              | 8.729 | 5.104 | 211.633                   |

**Table S3.** The average Bader charges of doped TM, Mn and O near the TM in TM- $\text{Li}_x\text{MnO}_3$  (TM = Cr, Mo, W) systems.

| System                        | $x$  | Average Bader charge (e) |        |                |
|-------------------------------|------|--------------------------|--------|----------------|
|                               |      | Mn                       | O      | TM (Cr, Mo, W) |
| $\text{Li}_x\text{MnO}_3$     | 2    | +1.897                   | -1.226 | +1.897         |
|                               | 1.75 | +1.903                   | -1.066 | +1.899         |
|                               | 1.5  | +1.928                   | -0.975 | +1.928         |
|                               | 1.25 | +1.940                   | -0.991 | +1.938         |
|                               | 1    | +1.960                   | -0.954 | +1.960         |
| Cr- $\text{Li}_x\text{MnO}_3$ | 2    | +1.897                   | -1.234 | +1.982         |
|                               | 1.75 | +1.912                   | -1.034 | +2.131         |
|                               | 1.5  | +1.933                   | -0.984 | +2.115         |
|                               | 1.25 | +1.928                   | -0.993 | +2.145         |
|                               | 1    | +1.958                   | -0.933 | +2.117         |
| Mo- $\text{Li}_x\text{MnO}_3$ | 2    | +1.867                   | -1.294 | +2.544         |
|                               | 1.75 | +1.889                   | -1.132 | +2.726         |
|                               | 1.5  | +1.917                   | -1.087 | +2.732         |
|                               | 1.25 | +1.918                   | -1.104 | +2.725         |
|                               | 1    | +1.973                   | -1.066 | +2.747         |
| W- $\text{Li}_x\text{MnO}_3$  | 2    | +1.779                   | -1.264 | +2.962         |
|                               | 1.75 | +1.889                   | -1.177 | +2.999         |
|                               | 1.5  | +1.914                   | -1.136 | +3.003         |
|                               | 1.25 | +1.918                   | -1.149 | +2.985         |
|                               | 1    | +1.952                   | -1.112 | +3.001         |

**Table S4.** The average formation enthalpies of different Li vacancies in fully lithiated

Li<sub>2</sub>MnO<sub>3</sub> and TM-Li<sub>2</sub>MnO<sub>3</sub>(TM=Cr, Mo, W)

| System                              | Site       | Formation enthalpy (eV) |
|-------------------------------------|------------|-------------------------|
| Li <sub>2</sub> MnO <sub>3</sub>    | 2 <i>b</i> | 4.78                    |
|                                     | 2 <i>c</i> | 4.67                    |
|                                     | 4 <i>h</i> | 4.62                    |
| Cr-Li <sub>2</sub> MnO <sub>3</sub> | 2 <i>b</i> | 4.30                    |
|                                     | 2 <i>c</i> | 4.21                    |
|                                     | 4 <i>h</i> | 4.18                    |
| Mo-Li <sub>2</sub> MnO <sub>3</sub> | 2 <i>b</i> | 2.89                    |
|                                     | 2 <i>c</i> | 2.79                    |
|                                     | 4 <i>h</i> | 2.75                    |
| W-Li <sub>2</sub> MnO <sub>3</sub>  | 2 <i>b</i> | 2.55                    |
|                                     | 2 <i>c</i> | 2.43                    |
|                                     | 4 <i>h</i> | 2.43                    |

**Table S5.** The average formation enthalpies of O vacancies around TM at different delithiation stages in TM-Li<sub>2</sub>MnO<sub>3</sub>(TM=Cr, Mo, W)

| System                       | $x$  | Average formation enthalpy (eV) |
|------------------------------|------|---------------------------------|
| $\text{Li}_x\text{MnO}_3$    | 2    | 2.59                            |
|                              | 1.75 | 0.45                            |
|                              | 1.5  | 0.10                            |
|                              | 1.25 | -0.07                           |
|                              | 1    | -0.63                           |
| $\text{Cr-Li}_x\text{MnO}_3$ | 2    | 2.46                            |
|                              | 1.75 | -0.18                           |
|                              | 1.5  | -0.28                           |
|                              | 1.25 | -0.53                           |
|                              | 1    | -1.20                           |
| $\text{Mo-Li}_x\text{MnO}_3$ | 2    | 3.40                            |
|                              | 1.75 | 1.26                            |
|                              | 1.5  | 0.29                            |
|                              | 1.25 | 0.04                            |
|                              | 1    | -0.74                           |
| $\text{W-Li}_x\text{MnO}_3$  | 2    | 3.71                            |
|                              | 1.75 | 1.68                            |
|                              | 1.5  | 0.68                            |
|                              | 1.25 | 0.44                            |
|                              | 1    | -0.56                           |

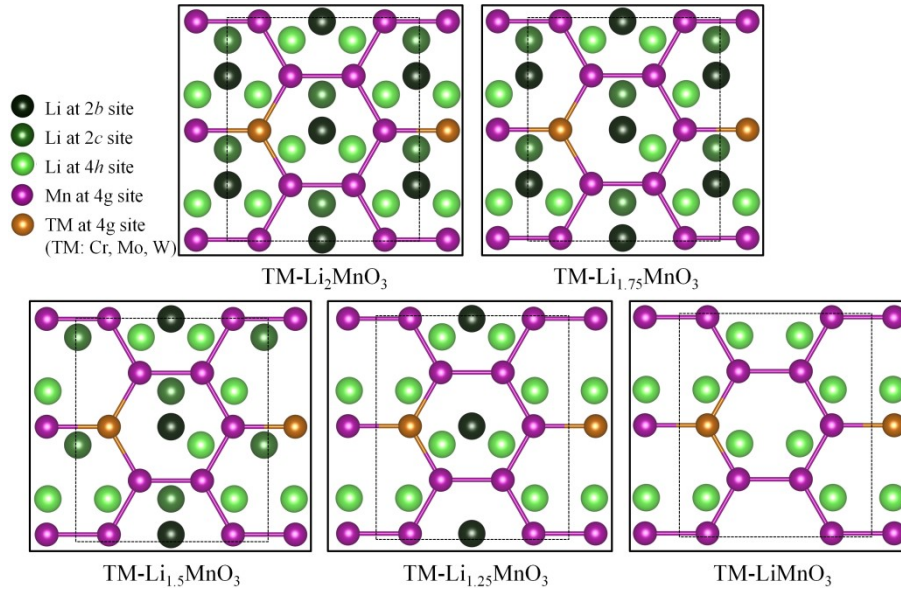

**Figure S1.** Illustrations of the partially delithiated structures of TM-Li<sub>*x*</sub>MnO<sub>3</sub> (*x* = 2, 1.75, 1.5, 1.25, 1). The black dashed box represents a structural period. The delithiation sequence is described as follows: (1) some Li ions at the 4*h* sites are extracted ( $1.75 \leq x < 2$ ), (2) some Li ions at the 2*b* sites are extracted ( $1.5 \leq x < 1.75$ ), (3) half of the Li ions at the 2*c* sites are extracted and the other half of Li ions at the 2*c* sites migrate to the 4*h* sites ( $1.25 \leq x < 1.5$ ), (4) all Li ions at the 2*b* sites are extracted ( $1 \leq x < 1.25$ ).

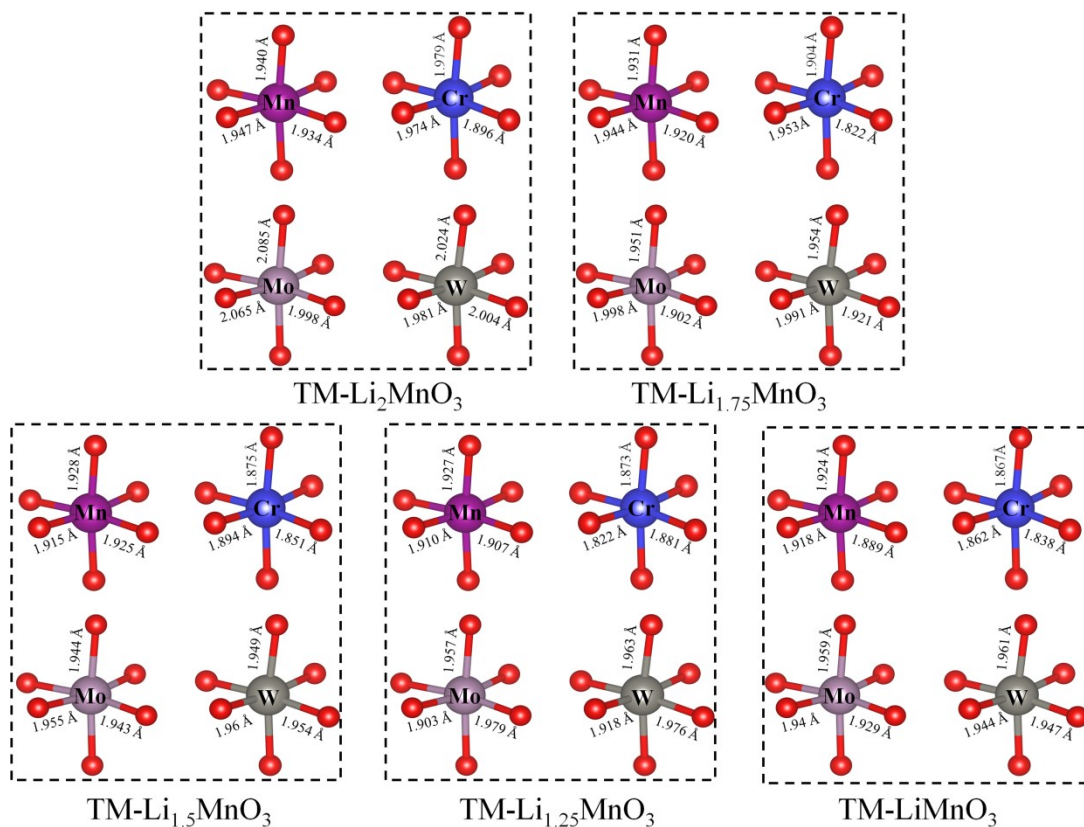

**Figure S2.** The Bond lengths of TM-O at different stages of delithiation of  $\text{TM-Li}_x\text{MnO}_3$  ( $x = 2, 1.75, 1.5, 1.25, 1$ ).



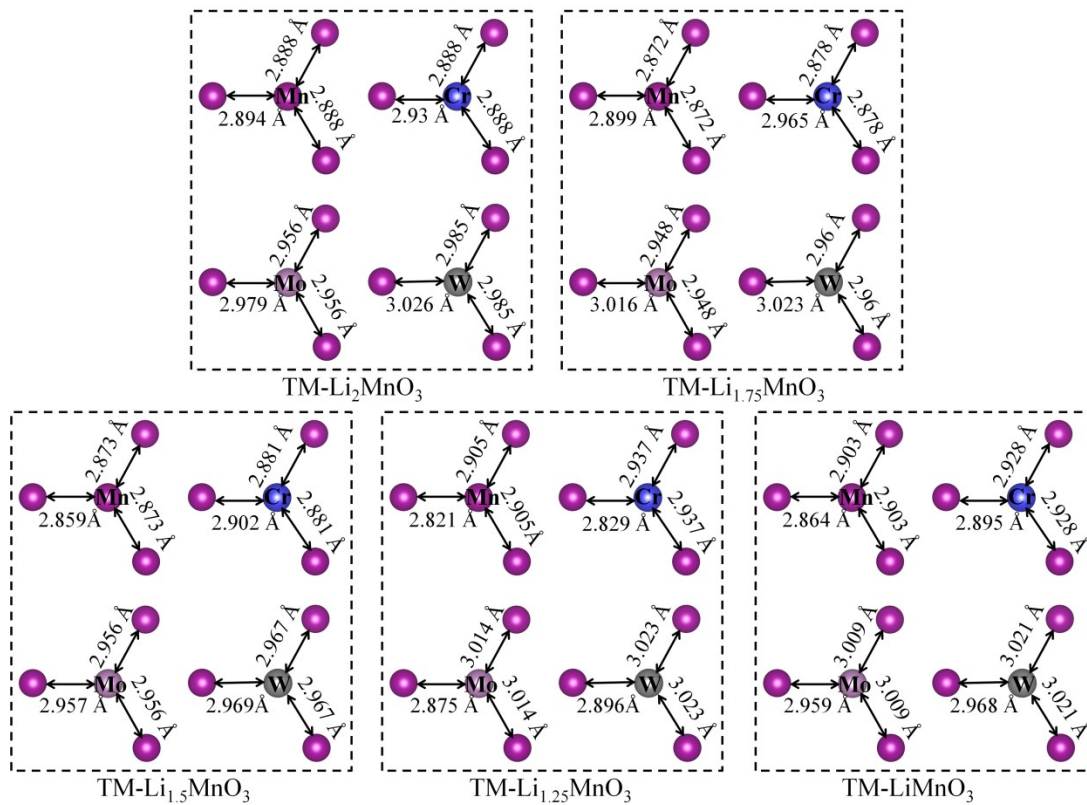

**Figure S3.** The distances between TM and its surrounding Mn at different stages of delithiation of  $\text{TM-Li}_x\text{MnO}_3$  ( $x = 2, 1.75, 1.5, 1.25, 1$ ).

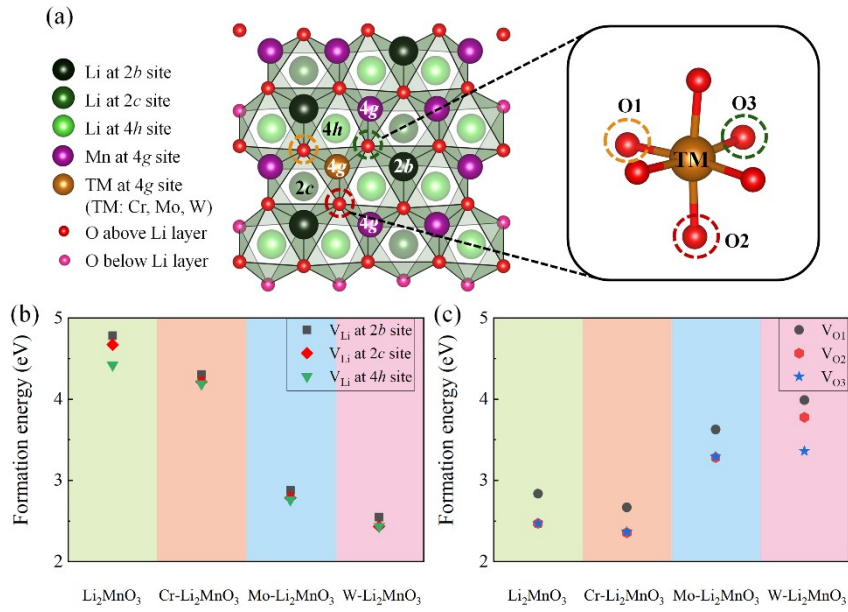

**Figure S4.** (a) Illustrations of the nearest Li and O sites near the TM doping site in TM-Li<sub>2</sub>MnO<sub>3</sub> (TM=Cr, Mo, W). (b) Formation enthalpies of different Li vacancies in TM-Li<sub>2</sub>MnO<sub>3</sub>. (c) Formation enthalpies of different O vacancies in TM-Li<sub>2</sub>MnO<sub>3</sub>.

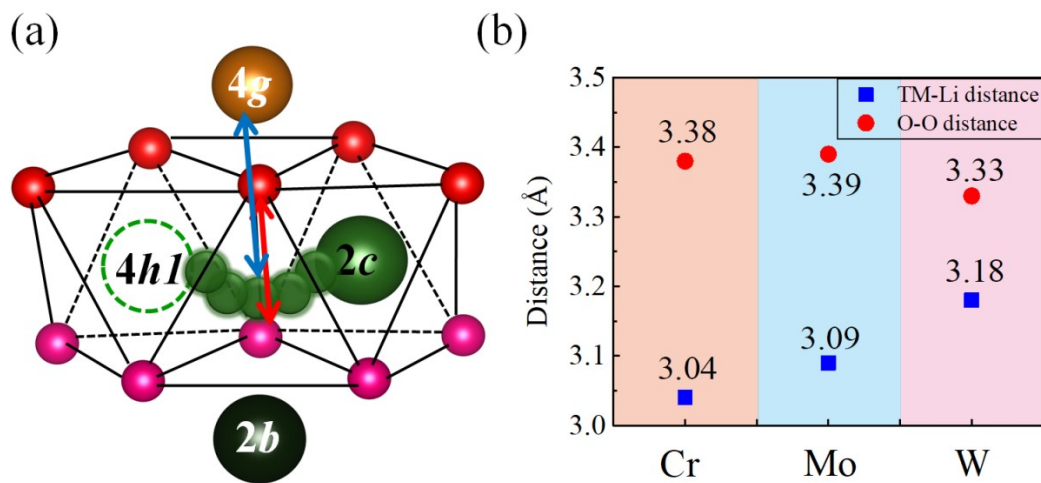

**Figure S5.** (a) Illustrations of the maximum distance between the mobile Li and TM in path 2c - 4h1 (shown by the blue arrow), and the maximum distance between O in O-O dumbbell structure (shown by the red arrow). (b) The values of the distances.
